# Supplementary material for: Organizational Readiness to Implement Community Pharmacy-Based Opioid Counseling and Naloxone Services: A Scoping Review of Current Practice Models and Opportunities
Source: MDPI journal article supplement (doi:10.3390/pharmacy11030099), 2023-06-11
Supplement: s1 [file s1]

## Supplementary Material

**Table S1.** Opioid counseling and naloxone service implementation resources and tools.

| Resource / tool name                                                                                                | Resource / tool content and purpose |                             |                                   |                               |                            |
|---------------------------------------------------------------------------------------------------------------------|-------------------------------------|-----------------------------|-----------------------------------|-------------------------------|----------------------------|
|                                                                                                                     | Opioid misuse screening             | Patient education materials | Pharmacist and provider education | Opioid prescribing guidelines | Pain management assessment |
| Substance Abuse and Mental Health Services Administration (SAMHSA) toolkit [36]                                     |                                     | X                           | X                                 |                               |                            |
| Prescribe to Prevent [37]                                                                                           |                                     | X                           | X                                 |                               |                            |
| Maximizing Opioid Safety with Naloxone (MOON) study [38]                                                            |                                     | X                           |                                   |                               |                            |
| One Rx Program [42]                                                                                                 |                                     | X                           | X                                 |                               |                            |
| Interagency Guideline of Prescribing Opioids for pain from the Washington State Agency Medical Directors Group [39] |                                     |                             | X                                 | X                             |                            |
| Centers for Disease Control and Prevention (CDC) Clinical Practice Guidelines for Prescribing Opioids for Pain [35] |                                     |                             | X                                 | X                             |                            |
| Prescription Opioid Misuse Index (POMI) [40]                                                                        | X                                   |                             |                                   |                               |                            |
| Opioid Risk Tool [ORT] [41]                                                                                         | X                                   |                             |                                   |                               |                            |
| SBIRT framework (screening, brief intervention, and referral to treatment) [43]                                     | X                                   |                             |                                   |                               |                            |
| Pain, Enjoyment, General Activity (PEG) tool [44]                                                                   |                                     |                             |                                   |                               | X                          |
